# Supplementary material for: Analysis of local-scale background concentrations of methane and other gas-phase species in the Marcellus Shale
Source: Oxford University Press journal article supplement (doi:10.1525/elementa.182), 2017-01-01
Supplement: elementa-5-182-s1.docx [file elementa-5-182-s1.docx]

Analysis of local-scale background concentrations of methane and other gas-phase species in the Marcellus Shale

J. Douglas Goetz1, Anita Avery1, Ben Werden1, Cody Floerchinger2, Edward C. Fortner2, Joda Wormhoudt2, Paola Massoli2, Scott C. Herndon2, Charles E. Kolb2, W. Berk Knighton3, Jeff Peischl5,6, Carsten Warneke5,6, Joost A. de Gouw5,6,7, Eladio Knipping8, Stephanie L. Shaw8, and Peter F. DeCarlo1,9*

1. Department of Civil, Architectural, and Environmental Engineering, Drexel University, Philadelphia, Pennsylvania, USA 2. Aerodyne Research, Inc., Billerica, Massachusetts, USA 3. Department of Chemistry and Biochemistry, Montana State University, Bozeman, Montana, USA 4. Institute of Meteorology and Geophysics, University of Innsbruck, Innsbruck, Austria 5. Cooperative Institute for Research in Environmental Sciences, University of Colorado Boulder, Boulder, Colorado, USA 6. Chemical Sciences Division, NOAA Earth System Research Laboratory, Boulder, Colorado, USA 7. Department of Chemistry and Biochemistry, University of Colorado, Boulder, Colorado, USA 8. Electric Power Research Institute, Palo Alto, California USA 9. Department of Chemistry, Drexel University, Philadelphia, Pennsylvania USA

* corresponding author

**Supporting Information**

The following supporting information contains information that is relevant but not critical to the interpretation of the manuscript. The following sections provide information about the ambient concentrations observed during this study, and meteorology while measurements took place including the planetary boundary layer height and wind speed. Also included are HYSPLIT back trajectories for each day of each study period. The ambient concentrations section contains summarized concentration data from observations in Southwestern PA and Northeastern PA in 2012 by the Aerodyne Mobile lab and observations from Northeastern PA in 2015 by the Drexel Mobile Lab. The planetary boundary layer (PBL) height contains height estimates from all study periods made using the NOAA North American Regional Reanalysis model products. The supporting information contains 11 pages, 4 sections, and 5 figures.

1. Ambient Concentrations

Observed ambient concentrations of CO, NO2, methane, ethane, and PTR-MS measured VOC can be seen in Figure S1. The results in Figure S1 show the average concentrations, standard deviations (upper bounds) and minimums (lower bounds) for the monitored species in both SW PA and NE PA. The summary statistics were calculated using all on-road and stationary measurements with the exception of measurements taken while stopped in traffic, when self-sampling exhaust, and when downwind of sites sampled for the emission characterization portion of the campaign. Since most on-road measurements were included in the summary statistics, the values shown in Figure S1 represent both background concentrations and elevated concentrations from local emissions sources. Contributing local sources likely included on-road and off-road vehicles, manufacturing, power generation, natural gas infrastructure, biomass burning, vegetation, and agriculture, all of which was observed visually from the mobile labs.

In 2012, CH4 was observed to have an average of 1.97 ppmv, and a standard deviation of 0.23 ppmv in NE PA over the 6-day sampling period. In the SW PA study area CH4 was observed at 2.15 ± 0.30 ppmv over a 7-day averaging period. In 2015, CH4 observed was to have an average of 2.09 ppmv, and a standard deviation of 0.17 ppmv over the 5-day sampling period. Ethane, which was only measured in SW PA, was observed at 7.41 ± 24.0 ppbv. Carbon monoxide was observed to have an average mole fraction of ~240 ppbv in both study areas in 2012 and was observed to have large variability with standard deviations of 830 ppbv and 1510 ppb in NE PA and SW PA, respectively. In 2015, CO was observed at an average of 281 ppbv and had a large standard deviation of 2700 ppbv. The large standard deviation in 2015 compared to 2012 observations suggests that more direct unmixed emission plumes were observed in 2015. The average mole fraction of NO2 in the SW PA was observed to be 2.90 ± 6.48 ppbv.

**Figure S1.**  Ambient mole fractions of species monitored in Southwestern PA (blue) and Northeastern PA (green) in 2012. Ambient mole fractions of species monitored in 2015 are found in black. The average (marker), standard deviation(upper whisker) and minimum (lower whisker) are displayed for each species.

2. Comparison of the Percentile Smoothing and the Log Normal Mode

**Figure S2.** Cumulative frequency of the percent difference of the 20 minute percentile smoothed datasets of ethane, methane, and CO versus the mode of the lognormal fits for the same species.

Percent difference =100*|percentile-lognormal|/lognormal

3. Planetary Boundary Layer Height

The planetary boundary layer (PBL) height was estimated for each study period using the National Oceanic and Atmospheric Administration’s National Centers for Environmental Prediction (NCEP) North American Region Reanalysis (NARR) model [[1](#_ENREF_1)]. The NARR model provides 8 times daily geospatial climate data at a 32 kilometer resolution over the North American region and assimilates monitoring observations for reanalysis [[1](#_ENREF_1)]. The NARR modeling products include surface meteorological data, and data at multiple atmospheric pressure levels. For this study only the PBL product was used. The PBL height for each study region was estimated using two techniques based on the availability of the data formatted into individual 3-hour rasters, which were not available for 2015. The first technique estimated a location specific PBL based on the geoposition and time of each mobile measurement. The mobile data were then binned based on the 3-hour NARR modeling periods (0z, 3z, 6z, 9z, 12z, 15z, 18z, 21z) and the median of each bin calculated. The second approach was to estimate a region-wide PBL based on a composite average for each sampling week resolved to each 3-hour modeling period.

The results for both techniques for the 2012 measurements can be found in Figure S3. The results from the PBL height estimates in 2012 shows that the PBL was generally higher in Southwestern PA (SW PA) in September 2012 than in Northeastern PA (NE PA) in August 2012. Though based on the composite averages the PBL was similar in both regions in the midday and afternoon local time (15z, 18z, 21z) when the PBL is at its highest (Figure S3). Comparisons of the NE PA PBL show that the PBL was generally higher when sampling in 2015 than in 2012 (Figure S4). The results also indicate that early morning (local time) PBL height composite averages were similar for both study periods. Median location specific PBL heights are not shown in Figure S4 because independent 3-hour model outputs were not available for 2015.

**Figure S3.** Three hour planetary boundary layer (PBL) height estimated for the Northeastern PA and Southwestern PA during the 2012 study period. The median of the location specific PBL for each model time period is shown as square markers. The region wide mean PBL for each model time period is displayed as asterisks. The color scale denotes the model time period.

**Figure S4.** Three hour planetary boundary layer (PBL) height estimated for the Northeastern PA 2012 study period versus the same for the 2015 study period. The region wide mean PBL for each model time period is displayed as asterisks. The color scale denotes the model time period.

4. Back trajectories using HYSPLIT

The origin of each daily air mass was estimated using NOAA Hybrid Single Particle Lagrangian Integrated Trajectory Model (HYSPLIT) back trajectories [[2](#_ENREF_2), [3](#_ENREF_3)]. A 48-hour back trajectory was calculated for each sampling day with a midday (12:00) end time. Each trajectory was estimated at a height of 500 meters above ground level. For the NE PA study periods the start of each back trajectory was Laporte, PA (41.422 N, 76.488 W). The town of Laporte was chosen because it is centrally located in NE PA and because it was the location of NE PA nighttime measurements in 2012. In SW PA, Hidden Valley PA (40.024 N, 79.299 W) was chosen as the starting location of the daily back trajectories because it was the location of SW PA nighttime measurements in 2012.

The HYSPLIT back trajectory results are shown in Figure S5. Based on the back trajectories it is clear that most of the air masses observed in each study period were from regions west of the Marcellus or from within the Marcellus region 48 hours prior to being measured. The NE PA 2012 study region, however, was found to have three daily trajectories from the East and two with 48-hour origins in the Atlantic Ocean (Figure S4). Additionally, except for the two back trajectories originating in the Atlantic Ocean, the remainder of the trajectories in the NE PA 2012 study period generally covered a shorter distance than the trajectories calculated for the other two study periods. The unique back trajectories for the NE PA 2012 study period suggests that the air masses observed during that study period had different origins than the air masses observed during the other two study periods. The effect of air mass origin on the local background results in this work is uncertain.

**Figure S5.** Map of HYSPLIT back trajectories for the three study periods. Daily back trajectories for NE PA 2012, SW PA 2012, and NE PA 2015 are found as red, green, and blue lines, respectively. The starting point for the NE PA back trajectories (black circle) is Laporte, PA. The starting point for the SW PA back trajectories (black circle) is Hidden Valley, PA.

5. Wind Speed

The wind speed for each study period is summarized in Figure S6. In 2012, the Aerodyne Research Inc. Mobile Lab (AML) was equipped with a sonic anemometer and wind direction and speed was monitored continuously while driving and during stationary sampling. The box and whisker plots in Figure S5 show the 10th, 25th, 50th, 75th, and 90th percentiles of the AML measured wind speeds for NE PA and SW PA in 2012. The median wind speed observed in NE PA in 2012 was 0.5 m/s and 0.9 m/s in SW PA. The mean wind speed for the same study periods was 0.88 m/s and 1.46 for NE PA and SW PA in 2012, respectively. Mobile wind speed was not monitored in NE PA in 2015 and therefore summary statistics from ground-based observation cannot be made. To estimate the wind speed during the study period daily averages and maximums were retrieved from the Williamsport Regional Airport (KIPT) found on the Weather Underground History website (www.wunderground.com). The mean wind speed for the 2015 study period was estimated to be 2.1 m/s and the mean maximum wind speed was estimated to be 6.5 m/s (Figure S6). A similar analysis for the NE PA 2012 study period from the same airport found a mean wind speed of 1.4 m/s and a mean maximum wind speed of 6.0 m/s for the study period. The Williamsport airport was chosen because it is centrally located in NE PA and has most recorded observations in the region. Wind speeds at the Allegheny County Airport (KAGC) were found to have a mean of 2.42 m/s and a mean maximum of 5.87 m/s during the SW PA study period. Generally, the strongest wind speeds were observed during the SW PA study period followed by 2015 study period. However, there is little difference between the mean maximum wind speeds of the three study regions.

**Figure S6.** Summary statistics of wind speed for the NE PA and SW PA study period in 2012 and the NEPA study period in 2015. The box and whisker plots represent the 10th, 25th, 50th, 75th, and 90th percentiles of wind speeds measured by the AML. The mean wind speed estimated from the AML dataset in 2012 is displayed as open circles. Mean airport measured wind speeds from the Williamsport Regional Airport in NE PA and the Allegheny County Airport in SW PA are displayed as solid squares. Mean maximum wind speeds from the same airports are displayed as crosses.

1. NCEP, *North American Regional Reanalysis*, 2015: http://www.emc.ncep.noaa.gov/mmb/rreanl/.

2. Stein, A.F., Draxler, R.R., Rolph, G.D., Stunder, B.J.B., Cogen, M.D., and Ngan, F., *NOAA's HYSPLIT atmospheric transport and dispersion modeling system, Bull.* American Meteological Society, 2015. **96**: p. 2059-2077.

3. Rolph, G.D., *Real-time Environmental Applications and Display sYstem (READY) Website (http://www.ready.noaa.gov).* NOAA Air Resources Laboratory, 2016.
